# Supplementary material
Source: PubMed Central journal article supplement (PMC548582)
Supplement: pnas_102_6_2152__1.pdf [file pnas_102_6_2152__1.pdf]

**Table 3. Detailed demographic characteristics of the Harvard Brain Tissue Resource Center Study Group**

| <b>Nonpsychiatric subjects</b> |          |          |          |          |          |          |          |          |          |          |          |
|--------------------------------|----------|----------|----------|----------|----------|----------|----------|----------|----------|----------|----------|
| <b>a</b>                       | <b>b</b> | <b>c</b> | <b>d</b> | <b>e</b> | <b>f</b> | <b>g</b> | <b>h</b> | <b>i</b> | <b>j</b> | <b>k</b> | <b>l</b> |
| M                              | 66       | 19       | 6.8      | 1.1      | 1.4      | 1.5      | 44       | -        | 1        | -        | -        |
| M                              | 40       | 28       | 6.5      | 1.7      | 3.4      | 0.5      | 46       | -        | 3        | -        | -        |
| M                              | 69       | 15       | 6.9      | 1.3      | 2.8      | 1.5      | 44       | -        | 1        | -        | -        |
| F                              | 78       | 14       | 6.2      | 1.6      | 2.5      | 1.3      | 42       | -        | 1        | -        | -        |
| M                              | 36       | 24       | 6.3      | 1.5      | 2.3      | 1.1      | 44       | -        | 1        | -        | -        |
| M                              | 37       | 19       | 6.7      | 1.2      | 1.4      | 1.3      | 49       | -        | 3        | -        | -        |
| M                              | 49       | 25       | 6.8      | 1.0      | 1.5      | 1.4      | 45       | -        | 1        | -        | -        |
| M                              | 29       | 18       | 7.1      | 1.2      | 1.8      | 1.3      | 44       | -        | 5        | -        | -        |
| F                              | 53       | 24       | 5.8      | 2.3      | 3.6      | 0.6      | 44       | -        | 2        | -        | -        |
| M                              | 40       | 17       | 6.2      | 1.2      | 2.0      | 1.2      | 48       | -        | 1        | -        | -        |
| F                              | 74       | 12       | 6.3      | 1.5      | 2.3      | 0.8      | 45       | -        | 5        | -        | -        |
| M                              | 54       | 24       | 6.6      | 1.0      | 1.5      | 1.3      | 53       | -        | 1        | -        | -        |
| M                              | 36       | 20       | 6.0      | 1.6      | 2.3      | 0.9      | 48       | -        | 1        | -        | -        |
| F                              | 70       | 22       | 6.3      | 2.3      | 3.7      | 0.4      | 37       | -        | 2        | -        | -        |
| M                              | 67       | 22       | 6.4      | 1.1      | 1.7      | 1.4      | 48       | -        | 1        | -        | -        |
| M                              | 42       | 18       | 6.8      | 1.0      | 1.4      | 1.1      | 54       | -        | 1        | -        | -        |
| M                              | 79       | 21       | 6.7      | 1.5      | 2.8      | 0.6      | 49       | -        | 2        | -        | -        |
| F                              | 78       | 24       | 6.7      | 1.4      | 2.3      | 0.9      | 48       | -        | 2        | -        | -        |
| M                              | 38       | 29       | 6.5      | 1.1      | 1.5      | 1.5      | 49       | -        | 1        | -        | -        |
| F                              | 65       | 24       | 6.4      | 1.1      | 1.8      | 1.3      | 52       | -        | 5        | -        | -        |
| F                              | 66       | 7        | 6.0      | 1.5      | 2.5      | 0.6      | 47       | -        | 2        | -        | -        |
| M                              | 89       | 7        | 6.4      | 1.5      | 2.4      | 1        | 47       | -        | 2        | -        | -        |
| M                              | 35       | 26       | 6.3      | 1.2      | 1.4      | 1.4      | 40       | -        | 5        | -        | -        |
| M                              | 50       | 24       | 6.0      | 2.1      | 3.1      | 1.1      | 42       | -        | 5        | -        | -        |
| M                              | 84       | 29       | 6.4      | 2.2      | 5.0      | 0.5      | 44       | -        | 1        | -        | -        |
| M                              | 73       | 20       | 6.0      | 1.5      | 2.5      | 1        | 40       | -        | 5        | -        | -        |

| <b>Schizophrenia patients</b> |          |          |          |          |          |          |          |          |          |          |          |
|-------------------------------|----------|----------|----------|----------|----------|----------|----------|----------|----------|----------|----------|
| <b>a</b>                      | <b>b</b> | <b>c</b> | <b>d</b> | <b>e</b> | <b>f</b> | <b>g</b> | <b>h</b> | <b>i</b> | <b>j</b> | <b>k</b> | <b>l</b> |
| M                             | 66       | 22       | 6.4      | 1.0      | 1.4      | 1.8      | 48       | 20       | 1        | H        | Y        |
| F                             | 83       | 23       | 5.9      | 2.0      | 3.5      | 0.2      | 42       | 55       | 3        | H        | Y        |
| M                             | 44       | 19       | 6.0      | 3.0      | 4.0      | 0.9      | 34       | 20       | 1        | Cz       | N        |
| M                             | 35       | 28       | 6.2      | 1.6      | 2.1      | 1        | 46       | 31       | 1        | UN       | N        |
| M                             | 46       | 18       | 6.3      | 3.2      | 2.6      | 1        | 45       | 19       | 3        | V, O     | Y        |
| M                             | 26       | 16       | 6.7      | 1.3      | 2.6      | 1.6      | 50       | 23       | 4        | F        | Y        |
| M                             | 42       | 27       | 6.6      | 1.0      | 2.0      | 1.2      | 45       | 16       | 2        | NT       | Y        |
| M                             | 47       | 19       | 6.6      | 2.0      | 4.0      | 1.9      | 47       | 17       | 2        | NT       | N        |
| M                             | 31       | 15       | 6.5      | 1.2      | 2.0      | 1.1      | 49       | 19       | 5        | R, O, Bp | Y        |
| M                             | 80       | 11       | 6.4      | 1.4      | 1.8      | 0.5      | 41       | 17       | 1        | Th, Mr   | N        |
| M                             | 49       | 19       | 6.6      | 1.0      | 1.2      | 1.8      | 50       | 19       | 4        | H        | Y        |

|   |    |    |     |     |     |     |    |    |   |           |   |
|---|----|----|-----|-----|-----|-----|----|----|---|-----------|---|
| M | 61 | 20 | 6.7 | 1.5 | 2.2 | 1.5 | 46 | 25 | 3 | H         | N |
| F | 73 | 24 | 6.1 | 1.6 | 3.0 | 0.5 | 47 | 23 | 2 | R, Fx     | N |
| M | 63 | 22 | 6.5 | 1.1 | 2.8 | 1.3 | 50 | 7  | 1 | Cz, Ta, H | N |
| F | 72 | 22 | 6.6 | 1.2 | 2.0 | 0.7 | 50 | 24 | 2 | R, Pa     | N |
| F | 84 | 26 | 6.1 | 1.7 | 2.8 | 0.5 | 40 | 34 | 1 | V         | N |
| M | 42 | 18 | 6.3 | 1.3 | 2.1 | 1   | 46 | 27 | 4 | Ta        | Y |
| F | 78 | 13 | 6.8 | 1.5 | 2.3 | 1.2 | 46 | 16 | 3 | L, H      | N |
| F | 48 | 34 | 6.6 | 1.2 | 1.5 | 1.3 | 47 | 17 | 1 | V, R Y    |   |

### Bipolar patients with psychosis

| a | b  | c  | d   | e   | f   | g   | h  | i  | j | k           | l |
|---|----|----|-----|-----|-----|-----|----|----|---|-------------|---|
| F | 64 | 11 | 6.7 | 1.0 | 1.7 | 1.3 | 51 | 20 | 1 | V, Cr, T, D | N |
| M | 38 | 41 | 6.5 | 1.0 | 1.2 | 1.4 | 43 | 37 | 4 | Se, L, V    | N |
| F | 80 | 12 | 6.5 | 3.0 | 4   | 1   | 27 | 38 | 3 | Pe, V       | N |
| F | 42 | 16 | 6.3 | 1.1 | 1.7 | 1.3 | 52 | 20 | 4 | V, L, Pe    | Y |
| M | 78 | 30 | 6.3 | 1.9 | 4.2 | 0.7 | 42 | 49 | 1 | Ch, F, V, L | N |
| F | 76 | 23 | 6.6 | 1.9 | 3.8 | 0.5 | 42 | 67 | 1 | L           | Y |
| M | 74 | 25 | 6.5 | 1.4 | 3.4 | 0.8 | 47 | 50 | 1 | V, Q        | Y |
| M | 74 | 7  | 6.7 | 2.9 | 4.1 | 1.3 | 33 | 72 | 1 | O           | N |
| F | 55 | 18 | 6.5 | -   | -   | 0.7 | 47 | 40 | 2 | V           | Y |
| F | 73 | 21 | 6.3 | 1   | 1.6 | 1.2 | 51 | 25 | 3 | R           | N |
| M | 74 | 14 | 6.3 | 1.9 | 2.7 | 0.5 | 38 | 18 | 1 | O, L, V     | N |
| F | 73 | 17 | 6.4 | 2.0 | 3.5 | 0.5 | 42 | 25 | 3 | V, R, Se    | N |
| M | 40 | 31 | 6.0 | 1.3 | 2.4 | 0.6 | 48 | 25 | 4 | R, Nf, Z    | Y |
| M | 83 | 17 | 6.6 | 1.6 | 3   | 1.3 | 47 | 43 | 1 | V, Pa       | Y |

### Bipolar patients without psychosis

| a | b  | c  | d   | e   | f   | g   | h  | i  | j | k          | l |
|---|----|----|-----|-----|-----|-----|----|----|---|------------|---|
| M | 51 | 31 | 7.0 | 1.8 | 3.4 | 0.9 | 44 | -  | 5 | UK         | - |
| F | 29 | 11 | 6.7 | 1.1 | 1.6 | 1.3 | 45 | -  | 4 | V, L, P, O | Y |
| M | 50 | 30 | 6.3 | 1.6 | 4.2 | 1.0 | 47 | 34 | 1 | L          | Y |
| M | 82 | 5  | 6.4 | 1.4 | 1.8 | 1.2 | 49 | 40 | 1 | NT         | Y |
| M | 38 | 22 | 6.2 | 1.4 | 2.1 | 1.3 | 43 | 25 | 4 | V, Pa, O   | N |

**a**, gender; **b**, age (yr); **c**, postmortem interval (PMI) (interval between death and brain fixation in formaldehyde in h); **d**, brain pH; **e**, 3'/5' glyceraldehyde-3-phosphate dehydrogenase (G3PDH) ratio; **f**, 3'/5'  $\beta$ -actin ratio; **g**, 28s/18s RNA ratio; **h**, percent probe sets present; **i**, age of onset of illness in yr; **j**, cause of death (1, cardiopulmonary failure; 2, cancer; 3, other; 4, suicide; 5, unknown); **k**, medication (Bp, bupropion; Cr, carbamazepine; Ch, chlorpromazine; Cz, clozapine; D, doxepin; Fx, fluoxetine; F, fluphenazine; H, haloperidol; L, lithium; Mr, mirtazapine; Nf, nefazodone; O, olanzapine; Q, quetiapine; Pa, paroxetine; Pe, perphenazine; P, phenelzine; R, risperidone; Se, sertraline; Th, thioridazine; Ta, trazodone; T, trifluoperazine; V, valproic acid; Z, ziprasidone; UN, never treated; NT, not treated 6 months or more before death; UK, unknown); **l**, abuse or dependency history (Y, yes; N, no).
