# Supplementary material
Source: PubMed Central journal article supplement (PMC548582)
Supplement: pnas_102_6_2152__4.pdf [file pnas_102_6_2152__4.pdf]

**Table 5. Inter- and intraassay variations in DNMT1 mRNA positive neuronal counts in BA9 of a nonpsychiatric subject\***

| L   | M   | V          | SS  | MS  | D | F    | P  |
|-----|-----|------------|-----|-----|---|------|----|
| I   | 9.6 | Interassay | 3.8 | 1.9 | 2 | 0.54 | NS |
|     |     | Intraassay | 26  | 3.2 | 8 |      |    |
| II  | 22  | Interassay | 18  | 8.8 | 2 | 1.73 | NS |
|     |     | Intraassay | 145 | 18  | 8 |      |    |
| III | 10  | Interassay | 10  | 5.1 | 2 | 1.53 | NS |
|     |     | Intraassay | 38  | 4.8 | 8 |      |    |
| IV  | 23  | Interassay | 3.6 | 1.8 | 2 | 0.40 | NS |
|     |     | Intraassay | 22  | 2.7 | 8 |      |    |
| V   | 11  | Interassay | 0.2 | 0.1 | 2 | 0.48 | NS |
|     |     | Intraassay | 37  | 4.6 | 8 |      |    |
| VI  | 11  | Interassay | 1.8 | 0.9 | 2 | 0.56 | NS |
|     |     | Intraassay | 23  | 2.9 | 8 |      |    |

L, cortical layer; M, mean; V, source of variation; SS, sum of squares; MS, mean squares; D, degrees of freedom; P, probability.

\*Similar results were obtained in schizophrenia patients.
